# Supplementary material for: Automatic Identification of Individual Primates with Deep Learning Techniques
Source: PubMed Central journal article supplement — iScience. 2020 Jul 25;23(8):101412. doi: 10.1016/j.isci.2020.101412 (PMC7415925; doi:10.1016/j.isci.2020.101412), 2020-07-25
Supplement: mmc1.pdf [file mmc1.pdf]

**iScience, Volume 23**

## **Supplemental Information**

### **Automatic Identification of Individual Primates with Deep Learning Techniques**

**Songtao Guo, Pengfei Xu, Qiguang Miao, Guofan Shao, Colin A. Chapman, Xiaojiang Chen, Gang He, Dingyi Fang, He Zhang, Yewen Sun, Zhihui Shi, and Baoguo Li**

## Supplementary Information - Transparent Methods

1 **Table S2.** The ablation experiments for Tri-attention network, related to Figure 1 and 2. The individual  
 2 identification accuracies obtained by Object level attention model and Partial level attention model and  
 3 Tri-attention network for 17 primate species with more than 19 individuals and four non-primate  
 4 species.  
 5

| Animal species                                                  | The channel of<br><b>Object level<br/>attention model</b> | The channel of<br><b>Partial level<br/>attention model</b> | Tri-attention<br>network |
|-----------------------------------------------------------------|-----------------------------------------------------------|------------------------------------------------------------|--------------------------|
| Weeper Capuchin<br>( <i>Cebus olivaceus</i> )                   | 0.9010                                                    | 0.7802                                                     | 0.9305                   |
| Black-capped Capuchin<br>( <i>Cebus apella</i> )                | 0.8904                                                    | 0.9045                                                     | 0.9627                   |
| Rhesus Macaque<br>( <i>Macaca mulatta</i> )                     | 0.9101                                                    | 0.9322                                                     | 0.9126                   |
| Common Chimpanzee<br>( <i>Pan troglodytes</i> )                 | 0.8357                                                    | 0.8231                                                     | 0.9358                   |
| Common Squirrel Monkey<br>( <i>Saimiri sciureus</i> )           | 0.8928                                                    | 0.8968                                                     | 0.9083                   |
| Green Monkey<br>( <i>Chlorocebus sabaeus</i> )                  | 0.8449                                                    | 0.8992                                                     | 0.9477                   |
| Mandrill<br>( <i>Mandrillus sphinx</i> )                        | 0.8000                                                    | 0.9182                                                     | 0.9294                   |
| Golden Snub-nosed Monkey<br>( <i>Rhinopithecus roxellana</i> )  | 0.8845                                                    | 0.9340                                                     | 0.9412                   |
| François' langur<br>( <i>Trachypithecus francoisi</i> )         | 0.8571                                                    | 0.8571                                                     | 0.9014                   |
| Olive Baboon<br>( <i>Papio anubis</i> )                         | 0.9264                                                    | 0.7341                                                     | 0.9341                   |
| Ring-tailed Lemur<br>( <i>Lemur catta</i> )                     | 0.9193                                                    | 0.7897                                                     | 0.9457                   |
| De Brazza's Monkey<br>( <i>Cercopithecus neglectus</i> )        | 0.9326                                                    | 0.9299                                                     | 0.9508                   |
| Patas Monkey<br>( <i>Erythrocebus patas</i> )                   | 0.9255                                                    | 0.9184                                                     | 0.9562                   |
| Greater Spot-nosed Monkey<br>( <i>Cercopithecus nictitans</i> ) | 0.9014                                                    | 0.8309                                                     | 0.9543                   |
| Northern White-cheeked Gibbon<br>( <i>Nomascus leucogenys</i> ) | 0.9132                                                    | 0.9077                                                     | 0.9342                   |
| Tibetan Macaque<br>( <i>Macaca thibetana</i> )                  | 0.9430                                                    | 0.8134                                                     | 0.9504                   |

|                                                       |        |        |        |
|-------------------------------------------------------|--------|--------|--------|
| Crab-eating Macaque<br>( <i>Macaca fascicularis</i> ) | 0.8965 | 0.7471 | 0.9337 |
| Meerkat<br>( <i>Suricata suricatta</i> )              | 0.9010 | 0.7796 | 0.9013 |
| Lion<br>( <i>Panthera leo</i> )                       | 0.9192 | 0.6563 | 0.9355 |
| Red Panda<br>( <i>Ailurus fulgens</i> )               | 0.9170 | 0.8264 | 0.9216 |
| Tiger<br>( <i>Panthera tigris</i> )                   | 0.9256 | 0.8807 | 0.9438 |

6

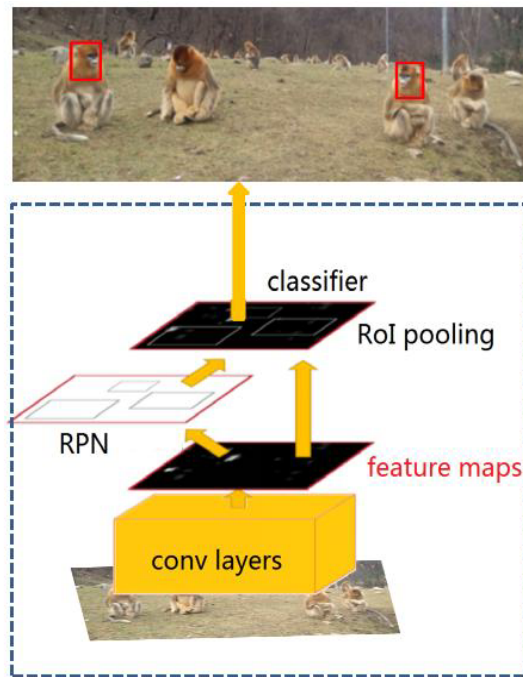

7

8 **Figure S1.** The face detection of golden snub-nosed monkeys by Faster RCNN, related to Figures 2,

9 4 and 5. We can detect the monkeys' faces when they show their faces. However, the other two

10 individuals lower their heads in this moment, which results in Faster RCNN cannot find their faces.

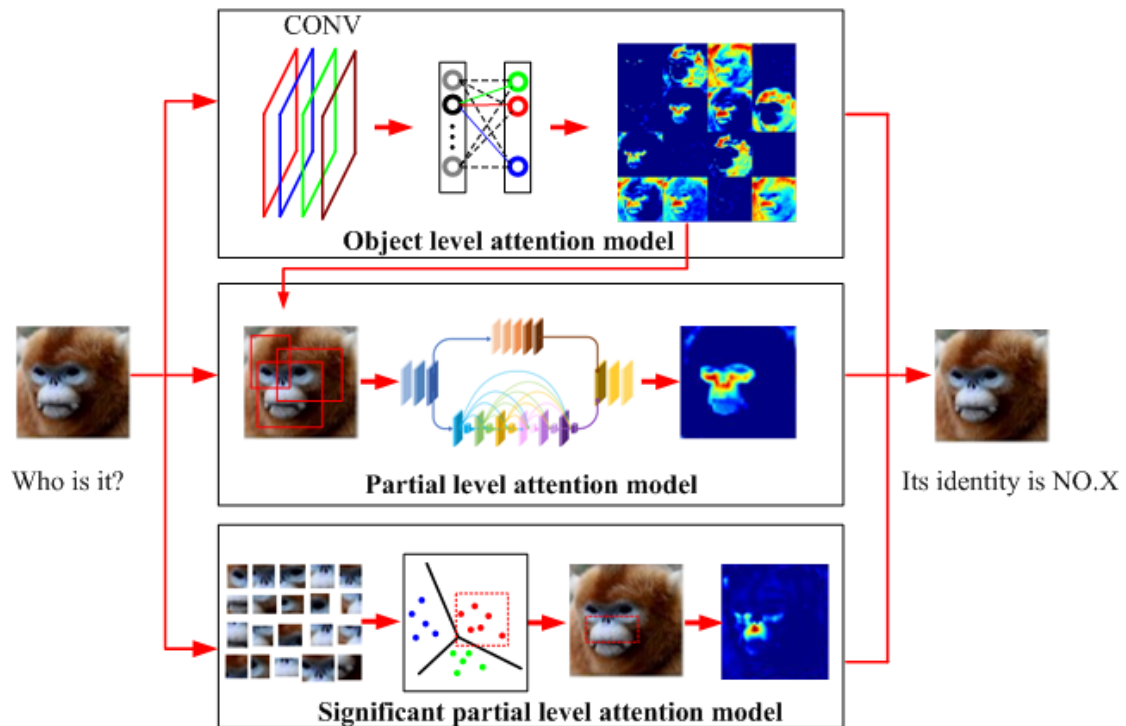

11  
12  
13  
14  
15  
16  
17

**Figure S2.** The framework of Tri-attention network, related to Figure 2. Object level attention model is used mainly to extract the features of the whole facial image. Significant partial level attention model pays attention to capture the local feature of a relatively fixed facial skin area. Partial level attention model focuses on the specific feature of a restricted smaller area, and different individuals would have their own specific facial areas.

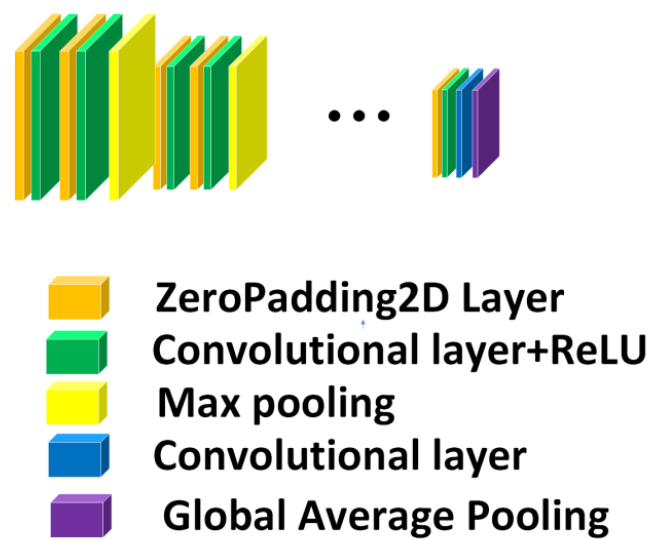

18  
19  
20  
21

**Figure S3.** Object level attention model, related to Figure 2.

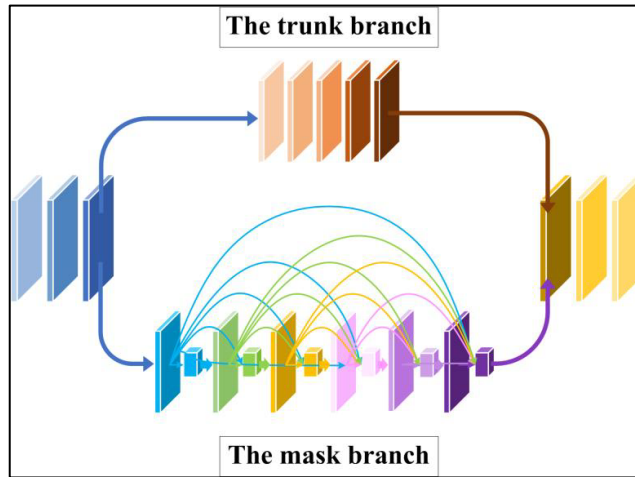

22  
23

**Figure S4.** The structure of residual network with attention mechanism, related to Figure 2.

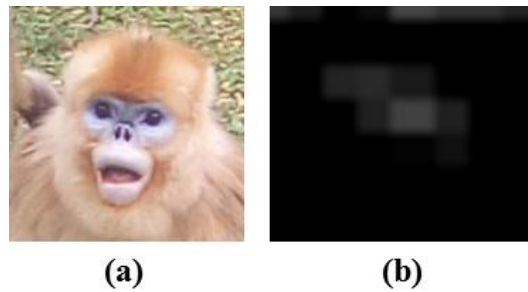

24

25 **Figure S5.** The feature map shows the model pays attention to feature extraction from the “skin area”,  
26 related to Figure 2. (a) The facial image of golden snub-nosed monkey. (b)The feature map for the  
27 attentional facial region of the “skin area”.

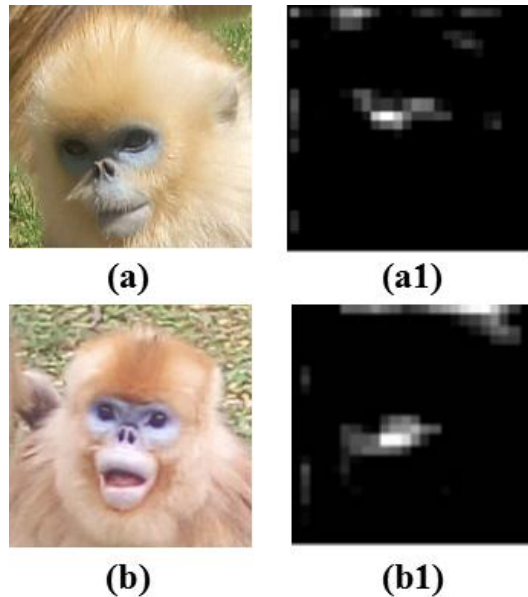

28

29 **Figure S6.** The original facial images of golden snub-nosed monkeys and the feature maps extracted by  
30 significant partial level attention model, related to Figure 2. (a) The facial image of golden snub-nosed  
31 monkey. (a1) The feature map for the attentional facial region. (b) The facial image of golden  
32 snub-nosed monkey. (b1) The feature map for the attentional facial region.

33

34

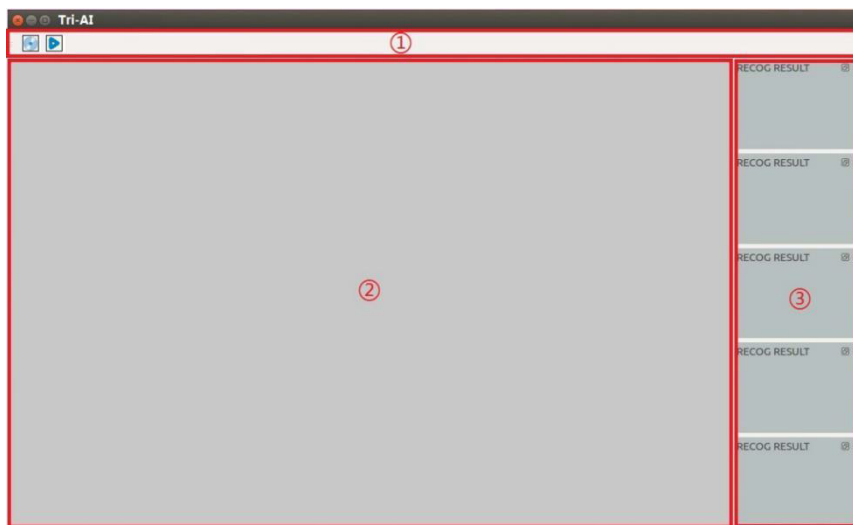

35  
36

Figure S7. The main page of Tri-AI system, related to Figure 2.

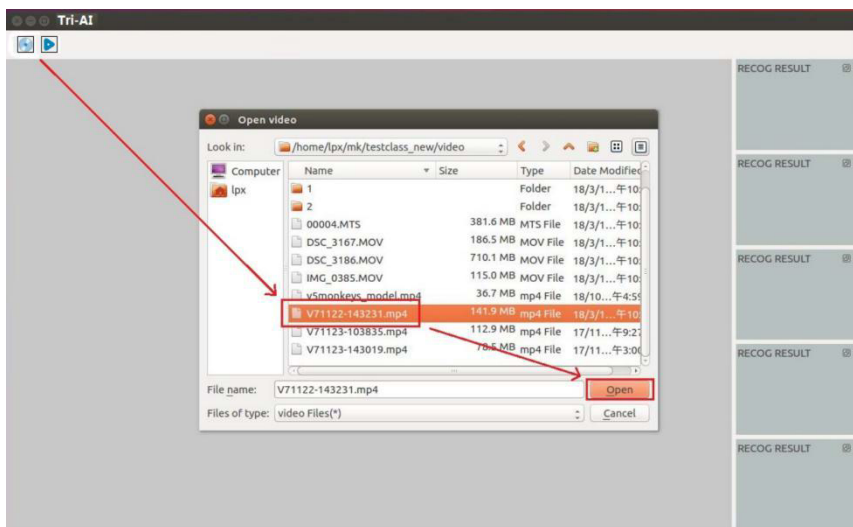

37  
38

Figure S8. Select an image or a video, related to Figure 2.

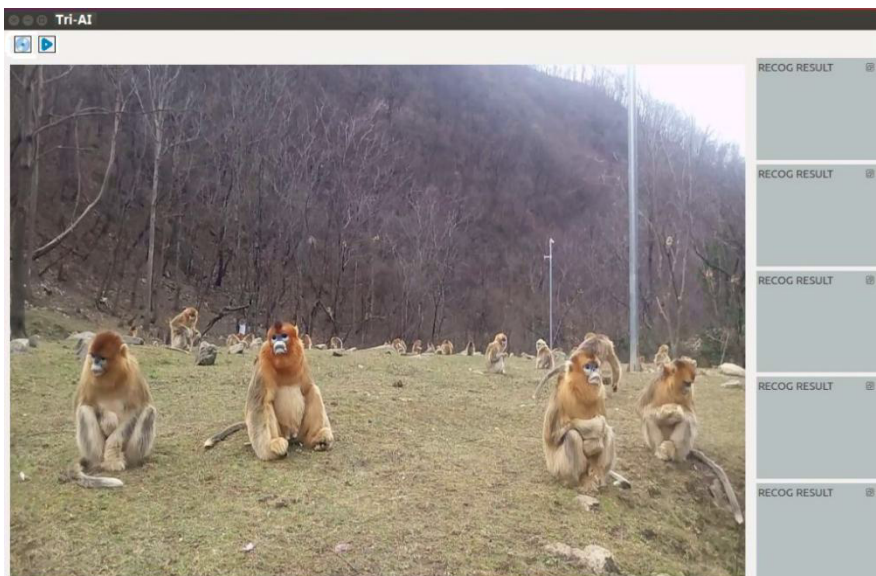

39  
40

Figure S9. The first frame of a video shown in the area ②, related to Figure 2.

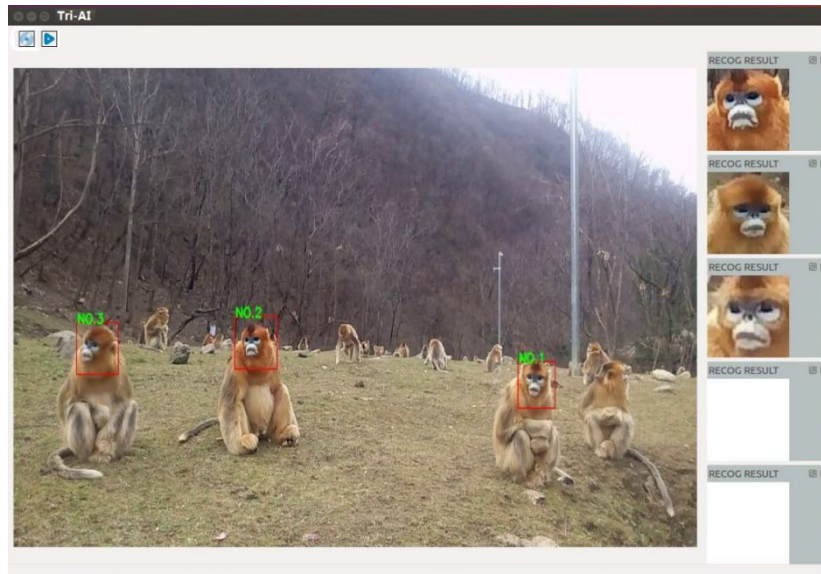

41  
42

**Figure S10.** The detection and recognition results, related to Figure 2.

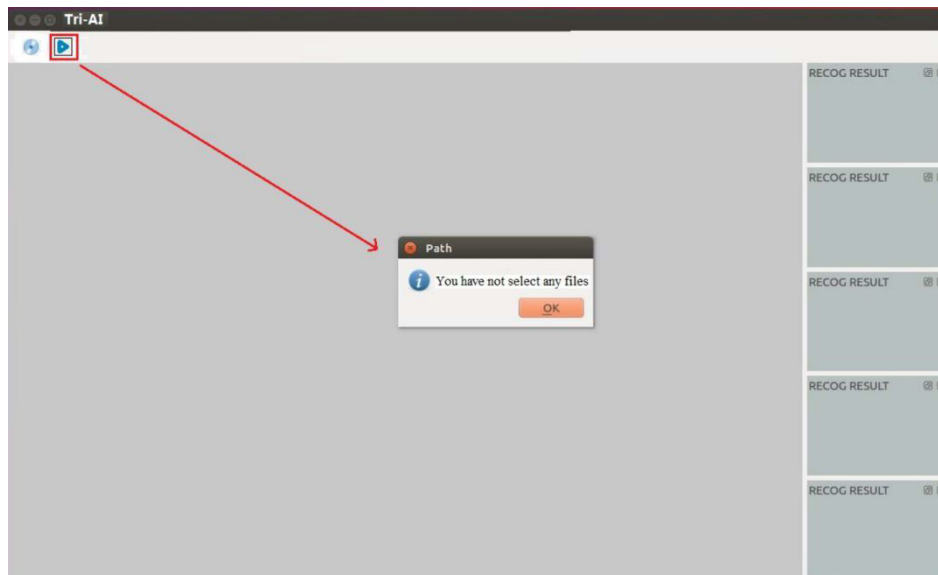

43  
44

**Figure S11.** Exception handling, related to Figure 2.

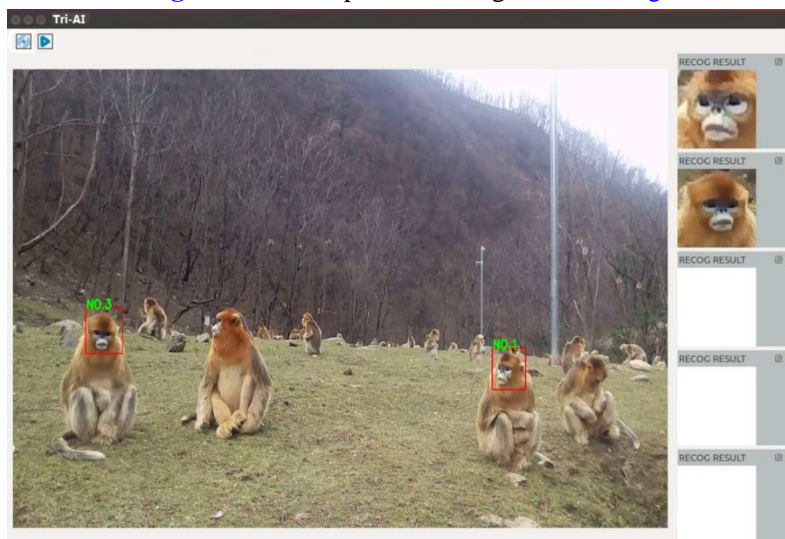

45  
46

**Figure S12.** The results of system testing, related to Figure 2.

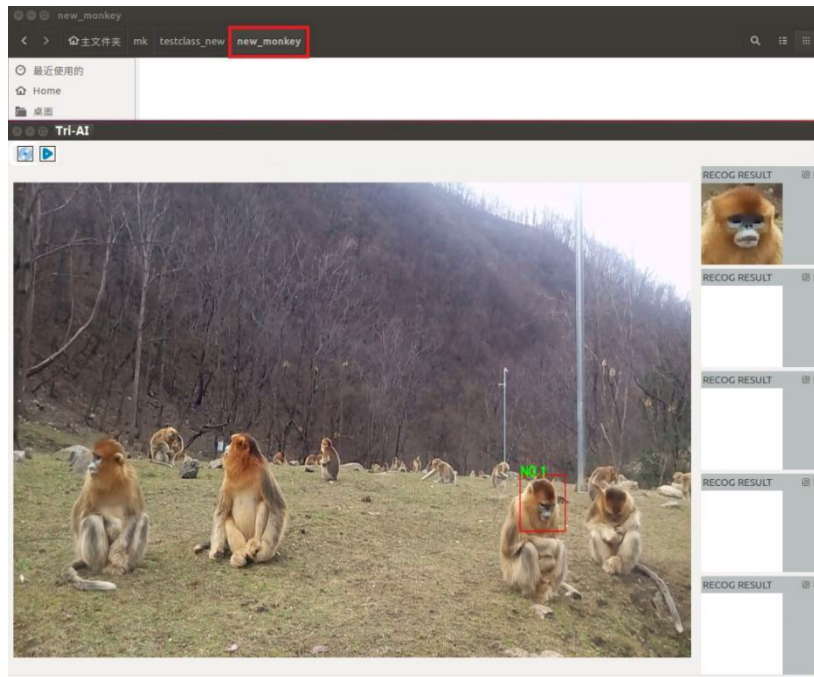

47  
48  
49

**Figure S13.** The recognition of a new individual. If the animals have their training facial images in the dataset, their identities can be recognized, related to Figure 2.

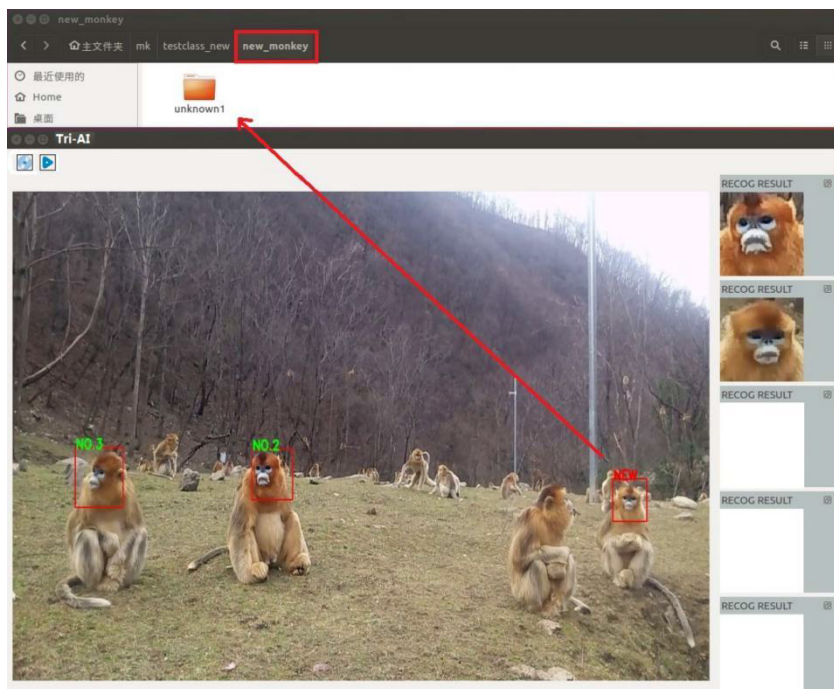

50  
51  
52  
53

**Figure S14.** The recognition of a new individual. The new individual is identified, and its facial images are added to the dataset automatically, related to Figure 2.



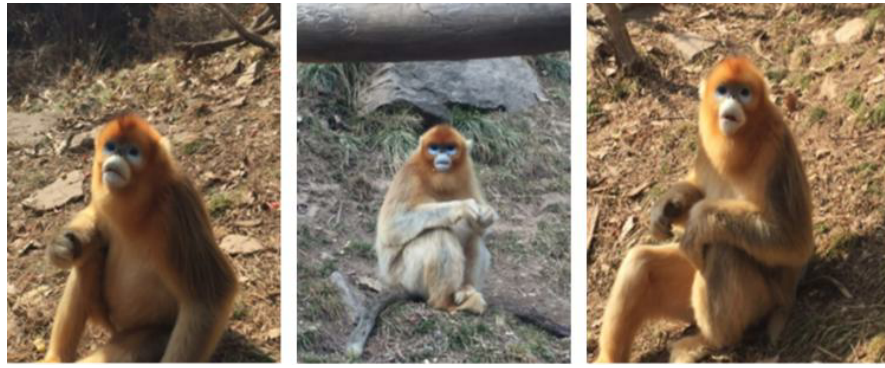

54

55

**Figure S15.** Usable images of golden snub-nosed monkeys, related to Figure 1.

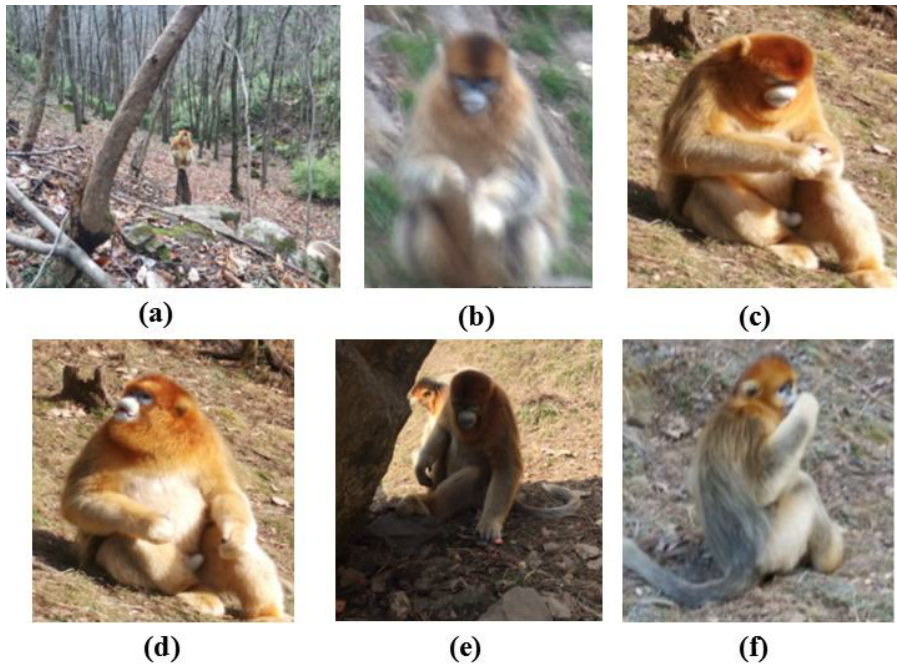

56

57

58

59

60

**Figure S16.** The unusable images under different conditions, related to Figure 1. (a) Too small face. (b) Motion blur. (c) Big angle of the face. (d) Big angle of the face. (e) Under shadow. (f) Covered by its hand.

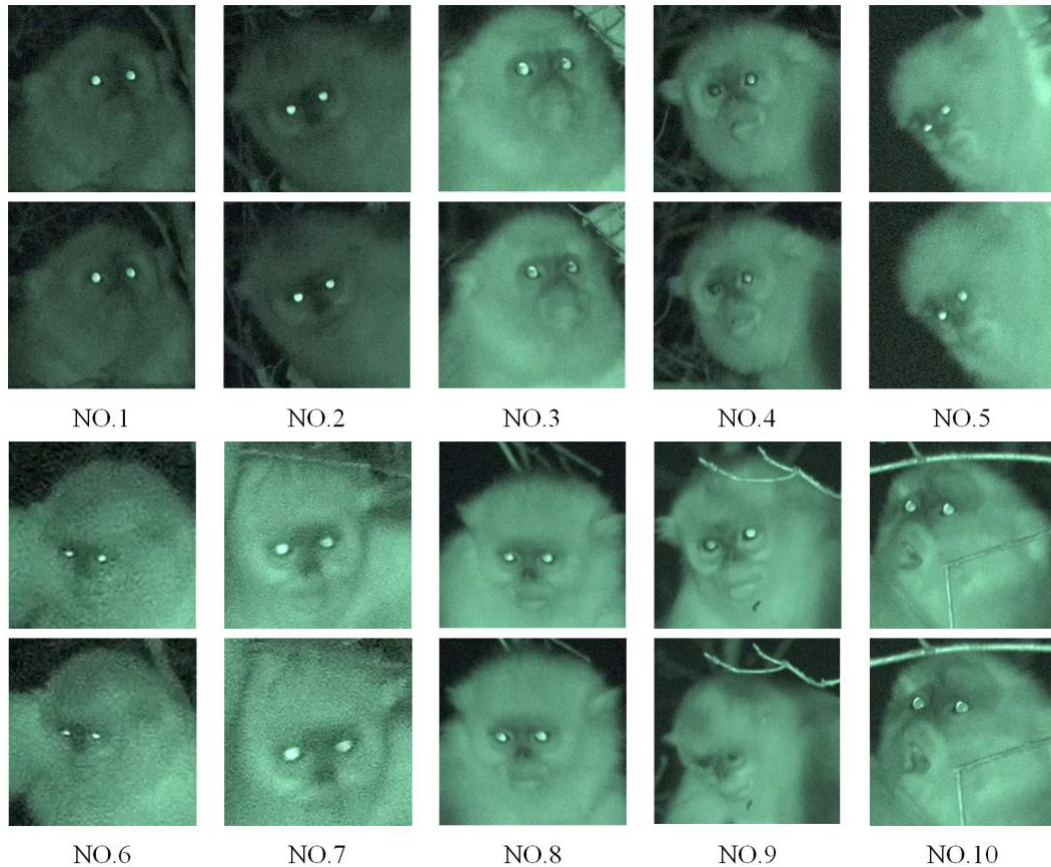

61  
62 **Figure S17.** The night facial images of golden snub-nosed monkeys, [related to Figures 2 and 3](#).

63  
64 **S1. Methods**

65 We developed the system Tri-AI using deep learning techniques to automatically detect and  
66 identify individual animals by their faces captured from images or videos. Faster Region-based  
67 Convolutional Neural Network (RCNN) (Ren et al., 2015) was used to detect the animals' faces and  
68 these detected facial images were identified by Tri-attention network, which are described in the  
69 following two subsections.

70 Before Tri-AI could be used, we had to obtain training and testing images and conduct data  
71 preprocessing ([Related to SI S4](#)). The prepared dataset was used to train Faster RCNN and Tri-attention  
72 network to develop the models of face detection and identification. We tested the performances of  
73 Tri-AI with a large number of images (Table S1). We have explored the implications of animals' facial  
74 image recognition, and the face detection and identification of golden snub-nosed monkeys  
75 (*Rhinopithecus roxellana*) with Tri-AI was divided into two major steps.

76 **(1) Face detection by Faster RCNN**

77 To identify individual, we first detected the animals' faces from the images or videos with Faster

78 RCNN (Ren et al., 2015), which is an effective tool for object detection and has the advantages of  
79 simple labeling and high efficiency and accuracy. For object detection, Faster RCNN involves two  
80 modules. One module is a deep fully convolution network that provides the proposed regions of the  
81 faces, and the other module is a detector to identify the final face regions from the proposed regions.  
82 Faster RCNN is a single unified network that is particularly useful for detecting the faces of golden  
83 snub-nosed monkeys (Figure S1). After sending the images to a CNN model for feature extraction, the  
84 Region Proposal Network (RPN) generates the proposal regions based on the extracted features  
85 (Related to SI S6), and approximately 300 proposal regions were generated from each image. These  
86 regions were then mapped to the feature map of the last convolution layer of CNN. Finally, the Region  
87 of Interest (ROI) pooling layers enabled each ROI to generate a fixed-size feature map and the  
88 combination of classification and regression was performed using Softmax Loss and Smooth L1 Loss  
89 to locate the animals' faces.

90 Before detecting the animals' faces, the original parameters in Faster RCNN were trained with  
91 sufficient images of the animals. Our labeling task was accomplished by marking their faces on the  
92 images with the software of labeling. The trained Faster RCNN could be used to detect the animals'  
93 faces from images or videos. For example, we used 1,200 images of golden snub-nosed monkey for  
94 labeling to detect the monkeys' faces by Faster RCNN.

95 To verify the effectiveness of Faster RCNN, we made several test experiments. The trained Faster  
96 RCNN was used to detect the faces of golden snub-nosed monkeys, Tibetan macaques and tigers from  
97 their images, which were captured by cameras. For the test images, we randomly selected 500 images  
98 for each species, and counted the number of the detected faces from the detection results to obtain the  
99 detection accuracy of 91.1% for golden snub-nosed monkeys, 97.7% for Tibetan macaques, and 97.7%  
100 for tigers. Furthermore, ten videos of 22 golden snub-nosed monkeys were used as the test data to  
101 evaluate the success ratio of detection and identification. Then we checked the detection and  
102 recognition results frame by frame and obtain 98.70% of face detection accuracy. In addition, we used  
103 the full precision-recall curves to evaluate the Faster RCNN detector, and this resulted in some false  
104 detection cases.

105 We tracked animals' faces in the small areas around the locations of their detection in former  
106 frames. For a given video, Faster RCNN was used to detect the face regions on the first frame of the  
107 video, and then for the following frames. The face regions were detected by Faster RCNN only on

108 smaller image areas based on the former detected face locations.

## 109 **(2) Individual identification of primates by Tri-attention network**

110 For fine-grained recognition in the field of image recognition, the deep network models with  
111 attention mechanism would focus on a certain part of the image, and the extracted features may be the  
112 key features, which have the major differences from those of other classes. Thus, the performance of  
113 the classification algorithms can be improved. In this paper, a novel attention network model with three  
114 channels (Tri-attention network) was designed for the task of fine-grained individual recognition using  
115 primate facial images (Figure S2).

116 The Tri-attention network has three channels, and each channel has its own attention network  
117 models, including object level attention model to extract the global facial features, partial level  
118 attention model to focus on the facial region of interest, and significant partial level attention model to  
119 select a key smaller facial region for extracting the specific facial features. These three channels with  
120 different network structures extract three types of facial features, which are then combined for animal  
121 individual identification. Therefore, Tri-attention network focuses on the facial features in different  
122 levels simultaneously.

123 These three models constitute three channels of our Tri-attention network, and each channel pays  
124 attention to different areas of the primate facial images at different levels and extracts the  
125 corresponding features. The features extracted by each channel are fused by cascade operation and used  
126 for classification by softmax.

127 To prove the validity of the roles of each channel, we conducted ablation experiments on the  
128 Tri-attention network. While, the significant partial level attention model is used to extract the  
129 fine-grained features on only one small facial region, and these features need to be combined with the  
130 global facial feature for individual identification. Therefore, this single stream network is suitable for  
131 animal face recognition. We made individual identification experiments using object level attention  
132 model and partial level attention model and Tri-attention network. The results show different roles of  
133 different channels in Tri-attention network (Table S2). The Tri-attention network has improved  
134 performance improvements compared to each single channel.

## 135 **(3) The Detailed Information of Tri-attention Network**

136 In the Tri-attention network model, the object level attention model mainly deals with global  
137 features of the facial image. The partial level attention model is concerned with a relatively fixed local

138 area in the facial image, and the significant partial level attention model focuses on a specific smaller  
139 area selected from the facial images of each individual, with the locations of the areas being different  
140 for different individuals.

#### 141 **(A) Object level attention model**

142 The features extracted by convolutional neural network (CNN) contain rich spatial information  
143 after multiple convolution and pooling layers. These feature maps need to be transformed into feature  
144 vectors by full connection layer. However, some effective information may be lost in this process, and  
145 the generalization ability of the model would be reduced. To solve this problem, the class activation  
146 mapping (CAM) strategy was used in object level attention model to reduce the impact of the fully  
147 connected layer on the loss of feature information. The global average pooling (GAP) layer was used in  
148 CAM instead of the fully connected layer in CNN, and the GAP layer calculated the average values of  
149 all the pixels in each feature map and converted all these average values into feature vectors for  
150 classification. The advantage of global average pooling layer is that there are no parameter settings,  
151 which means that the effective feature information can be preserved better, and the risk of overfitting  
152 be reduced.

153 Specifically, CAM was used to replace the fully connected layer with GAP. After GAP, the  
154 average value of each feature map in the last convolution layer was obtained. The final features were  
155 obtained by a weighted sum. The final extracted features were used as input in softmax for  
156 classification. We classified the numbers of regions which had an important impact for individual  
157 identification based on CAM. Due to the complex structure of Grad-CAM, we used the basic CAM  
158 here by considering the efficiency and complexity of the model.

159 The network structure of object level attention model has 12 convolution layers, 4 maximum  
160 pooling layers, and 1 GAP layer (Figure S3). The combination of the ZeroPadding2D layers and the  
161 convolutional layers can keep the sizes of the feature maps unchanged after convolution operations,  
162 while the sizes of the feature maps become a half of the original ones only after the maximum pooling  
163 operations. Correspondingly, the number of filters becomes twice as the former number after each  
164 pooling operation. Since the dimension of the output feature vector is related to the number of feature  
165 maps extracted by the previous convolution layer, we have added a convolution layer in front of the  
166 global average pooling layer, which ensures that the dimension of the resulting feature vector is  
167 consistent with the number of categories.

168

169 **(B) Partial level attention model**

170 Unlike human facial images, the primates general have more hair on their faces, and the shape and  
171 texture information of their hair are easily affected by many factors. However, the facial skin areas are  
172 relative invariant with respect to morphology and texture, which makes these skin areas more  
173 distinguishable. Therefore, partial level attention model mainly focuses on the facial skin area and  
174 minimizes the effects of hair and background on the recognition results. To achieve this, a residual  
175 network based on the attention mechanism was used in partial level attention model.

176 Different from object level attention model, the residual network with attention mechanism is a  
177 hierarchical structure. GAP is used to pay attention to extracting the feature maps of the entire facial  
178 images in object level attention model, while the residual network with attention mechanism used in  
179 partial level attention model is a stackable network structure, which can hierarchically pay attention to  
180 specific areas of the facial images. Our designed network model focuses on the skin area in primate  
181 facial images.

182 The structure of residual network with attention mechanism (ResNet-AM) is shown in [Figure S4](#),  
183 and it mainly contains two branches, including the trunk branch and the mask branch. The trunk branch  
184 is a convolutional neural network consisting of three convolution layers and three ZeroPadding2D  
185 layers, and the output feature maps are  $T_i(x)$ . The mask branch processes the input feature maps to  
186 obtain the attention feature maps  $M_i(x)$  with the same dimension as  $T_i(x)$ , and the weights of  
187  $M_i(x)$  are normalized. The final characteristics of local areas are expressed as:

188 
$$H_i(x) = T_i(x) \times M_i(x)$$

189 The partial level attention model is used to focus on the feature extraction of the skin areas. [Figure](#)  
190 [S5](#) shows the feature map in this model, and one can see this model mainly attends to "skin areas" for  
191 feature extraction. This partial level attention model is achieved by maximum pooling layer, which has  
192 two functions of reducing the dimensions of the extracted features and removing the redundant features  
193 of the images. After maximum pooling layer for down sampling and other layers, the obtained feature  
194 maps contain the important features from the original images for individual identification.

195 **(C). Significant partial level attention model**

196 Significant partial level attention model mainly focuses on the most significant area (the key facial

197 area) of the image, which consists of two steps: area selection and feature extraction. To generate the  
198 candidate areas for the facial images, Graph-Based segmentation (GBS) algorithm (Ohayon et al, 2013)  
199 are used to divide a facial image into a number of small candidate areas, and the color similarity  $S$   
200 between the  $i^{\text{th}}$  and  $j^{\text{th}}$  small areas can be calculated with the following equation:

$$201 \quad S = \sqrt{(r_i - r_j)^2 + (g_i - g_j)^2 + (b_i - b_j)^2}$$

202 The two areas with the most color similarity were then merged, and the two original sub-areas  
203 were removed. This process was performed until there were no original sub-areas left to be merged, so  
204 that we could obtain a set of candidate facial areas. For the set of candidate facial areas, we used a  
205 trained classification model to choose the key area for each individual, and we chose the merged facial  
206 areas with highest classification accuracy as the final key facial areas for the corresponding individual.

207 The significant partial level attention model can extract the highly separable features of key facial  
208 regions, which is reflected in the operation of key facial region selection from a large number of  
209 separated facial regions through a trained model (AlexNet) (Krizhevsky et al, 2012). Finally, the  
210 selected key facial region for each monkey's facial image was used for feature extraction. After the  
211 operation of convolution pooling, only the golden snub-nosed monkey 's eyes and nose were retained  
212 (Figure S6).

#### 213 **(D) Feature extraction from the key facial areas.**

214 For the selected key facial areas, VGG16 network is used for feature extraction. VGG16 has 16  
215 convolutional layers, the size of each convolution kernels is  $3 \times 3$ , the convolution step is 1, and the  
216 number of convolution kernels increases from the initial 64 to 128, 256, and 512. The size of the  
217 convolution kernels in pooling layer is  $2 \times 2$ . VGG16 has three fully connected layers. Since our  
218 Tri-attention network consists of three channels, the parameters of the full connection layer of VGG16  
219 would inevitably affect the overall performance of the whole network. Therefore, the parameters of the  
220 three fully connection layers are set as 1024, 512, and 128. We used VGG16 rather than residual blocks  
221 in the significant partial level attention model to extract the key facial regions by considering the model  
222 efficiency.

## 223 **S2. The operation instruction of Tri-AI**

### 224 **(1) Computer Requirements for Tri-AI**

225 Tri-AI runs on a small workstation with Intel Xeon(R) CUP E5-2650 V4 (2.20GHZ $\times$ 24), Graphics:  
226 GeForce GTX 1080 8g, RAM: 64GB, and Storage: 1TB. The codes of Tri-AI were written in C++ and

227 Python, and were compiled using g++. Its graphical interface was designed based on Qt, which was  
228 developed by the Qt Company in 1991 as an application development framework of cross-platform  
229 C++ graphical user interface. The supportive operation system was Ubuntu 14.04 (or an improved  
230 version of Ubuntu).

## 231 **(2) Specific Operations of Tri-AI to Detect and Recognize Faces**

232 Step 1: Start the application. Input the filename of our software in the command line, and press the  
233 enter button to start the software. This step intends to accomplish the tasks of animal face detection,  
234 identification, and tracking.

235 Step 2: The main interface will appear when our software finishes loading. The main interface has  
236 four areas (Figure S7). The area ① is functional area. Here, one can select the test images or videos and  
237 simply click on the “start” button to detect the monkeys’ faces from your selected images or videos.  
238 The area ② shows the selected images or videos and the corresponding detection and recognition  
239 results of monkeys’ faces. The area ③ presents the image of the face of the animal in the database that  
240 is most similar to the image that the software is being asked to identify.

241 Step 3: In the area ①, one can click on the first button to open an image file or a video file (Figure  
242 S8). When one clicks on “open” button, the selected image or video will appear in the area ② (Figure  
243 S9).

244 Step 4: In the area ①, one can click on “Start” button (the second button), and the system will  
245 start to detect the monkeys’ faces from the images or the videos and try to recognize who they are. If  
246 these monkeys show their frontal faces or profile faces not too far from directly ahead, the individuals  
247 will be identified and their corresponding information will be provided (e.g., IDs or names) and an  
248 image of each face will be shown in the area ③. These face images are selected from the database, and  
249 are the most similar to the monkeys’ faces the software is being asked to recognize (Figure S10).

## 250 **(3) Exception handling**

251 If one did not selected the test images or videos and simply click “Start”, a dialog box “You have  
252 not select any files” will pop up. In this case, click “OK” (Figure S11), and reselect a test image or  
253 video. One then can continue to make the following operations.

## 254 **(4) System testing**

255 Using golden-snub nosed monkeys as an example, when a monkey’s face is directed forward  
256 (frontal) or if the animal provides a profile face that is not too far off facing forward, Tri-AI will be



257 able to recognize this individual (Figure S12). Contrasting the same monkey presenting profile faces  
258 with different angles, the system can still get accurate recognition (Figure S10). If animals have their  
259 training facial images in the dataset, their identities can be recognized in the images or videos.  
260 Otherwise, they are identified as new individuals, and their facial images are added to the dataset  
261 automatically (Figures. S13 and S14).

### 262 **S3. Basic Strategies, Parameters, and Standards for Capturing Animal Facial Images**

263 Compared with acquiring human face images, it is much harder to capture animal facial images  
264 because both their living environment and behaviors are much uncontrollable. Therefore, we need to  
265 develop specific strategies to acquire different animals' facial images according to their habits and  
266 environment. In the process of capturing animals' facial images, it is desirable to use uniform norms  
267 and strategies to ensure the animals' facial images obtained within and between studies have high  
268 accuracy, regularity, and consistency. Based on our experience, we present guidelines for capturing  
269 facial images that are applicable to the theoretical and applied questions researchers are asking and the  
270 quality of images that can captured under often difficult field conditions.

#### 271 **(1) The basic strategies for capturing facial images:**

272 (A) If there are few individuals in the population/group being sampled, potentially an observer can  
273 see all individuals at once and get independent facial images one by one. This is the ideal situation that  
274 can often be done in zoo settings or with very small groups in the wild. However, in most cases, there  
275 are many individuals in one area and they cannot be captured in a single image or a set of temporally  
276 close images. Therefore, it is necessary for at least two or more people to cooperate, while one taking  
277 pictures; others can track the individual's movement to ensure the same individual is not repeatedly  
278 photographed.

279 (B) If there are hundreds of individuals in the population/group or if it is difficult to see all  
280 individuals at once as they are somewhat cryptic, it is hard or impossible to separate them artificially,  
281 and difficult to distinguish them from memory without potentially months of field work. But if one can  
282 temporarily mark individuals, with a harmless color ink for example, then it is possible to mark animals  
283 after its photos have been taken. However, all images must be obtained within a short time frame, so  
284 that the mark does not fade.

285 (C) For most species, it will not be possible to mark the animals as they are difficult to see and  
286 avoid humans. However, for some group living animals that live in stable small groups, like ring-tailed

287 lemurs (*Lemur catta*), a number of observers can each select a single or a few animals or a particular  
288 area occupied by the group and can quickly take each individuals facial image at the same time. Once  
289 Tri-AI is used to assign individuals, it may be possible to study the images to learn the unique  
290 individual features.

291 (D) For species that are cryptic (e.g., many social carnivores) or avoid human observers (e.g.,  
292 forest elephants (*Loxodonta cyclotis*), lowland gorillas (*Gorilla gorilla*), or giant forest hogs  
293 (*Hylochoerus meinertzhageni*)), but repeatedly come to specific locations, such as salt licks or  
294 waterholes, it may be possible to set multiple camera traps to simultaneously capture images of all or  
295 most of the group.

296 Above all, it is necessary to ensure that the repeated images, which are taken for the same  
297 individual, are unique individuals.

## 298 (2) Technical requirements for capturing primates' facial images

299 It is necessary to develop the basic parameters and standards to ensure that the collected images  
300 can meet the necessary requirements and we recommend the following specifications of the equipment,  
301 image quality, and quantity.

302 (A) Equipment: For most mammals, mobile phones take images of sufficient quality when the  
303 animals are less than 10 meters from the observer. However, if the animals are farther than 10 meters,  
304 high-quality single lens reflex (SPR) cameras which that can take more than 5 images/sec images with  
305 over 20 million pixels are recommended.

306 (B) Image resolution: The primate faces in the images should have 50×50 or more pixels. This is  
307 not a difficult standard to meet with most cameras if the animal is relatively close.

308 (C) Image clarity: The primate faces should be clear, in focus, and not blurred caused by the  
309 animals' movement or camera person's hand tremor.

310 (D) The angles of the face: Images of the face should be taken within the face angles of 30° (or  
311 between -15° and +15°) and it is desirable to increase the diversity of the samples from different face  
312 angles.

313 (E) Light: We should avoid taking photos when these animals are in the strong light or under the  
314 shadow.

315 (F) Cover: It is not desirable to have large areas of the animals' faces covered, but if some parts of  
316 the face are obscure the images may still be useful.

317 (G) The number of the images: It is best to have at least one hundred facial images per individual.

318 (H) Mark the face image data: After the needed number of suitable images are taken, each image  
319 must be accurately labeled manually and the mark information should include species, individual  
320 identity, age, sex, etc..

### 321 (3) Examples of the captured images:

322 We illustrate the basic parameters, strategies, and standards for capturing facial images using  
323 golden snub-nosed monkey.

324 (A) Usable images: The facial images should be clear, have more than 50×50 pixels, have the face  
325 primarily facing forward (i.e., have small side angles), and have appropriate light exposure. The images  
326 shown in [Figure S15](#) are suitable for use in our Tri-AI system.

327 (B) Unusable images. The following images cannot be used by the Tri-Ai System. The monkey's  
328 face in [Figure S16](#) (a) is too small, (b) has motion blur, (c) the angles of the monkeys' face is  
329 inappropriate as the animal is looking down, (d) the angles of the monkeys' face is inappropriate as the  
330 animal is looking to the side, (e) the monkey's face is under shadow, and (f), the monkey's face is  
331 covered by its hand.

332 Using these basic parameters, strategies, parameters, and standards, we were able to capture the  
333 facial images of more than forty species of primates. For some of these species, we obtained more  
334 photographed more than 1,040 individuals (e.g., golden snub-nosed monkeys in Qinling Nature  
335 Reserve and *Macaca thibetanas* in Tangjiahe Nature Reserve). Also, we captured the images of many  
336 species of primates from 18 zoos, including those in Beijing, Shanghai, Dalian, Weihai, Qindao,  
337 Ningbo, and Shijiazhuang. The images of most golden snub-nosed monkey individuals were captured  
338 in a number of different days, while the images of other animals were obtained in single days in the  
339 zoos. We got 102,399 facial images of primates.

### 340 **S4. Primate Facial Image Dataset**

341 Establishing facial image dataset provides an important foundation for the current and future  
342 scientific research. To collect sufficient facial images for multiple wildlife individuals, we traveled to  
343 18 zoos in 16 cities and 6 nature reserves in China and took images and videos of 1,040 individuals of  
344 41 primate species, and selected 102,399 facial images.

345 The collections of these images were fraught with challenges, such animals living in a complex  
346 arboreal environment, animals moving very fast, individuals engaging in a wide range of activities,

347 light conditions changed frequently, and shadow often fell across the animal's face. To acquire these  
348 images and videos, we explored many approaches for image acquisition, image selection, facial image  
349 extraction, and labeling the images. Based on this experience, we make the following recommendations  
350 for future users.

### 351 **(1) Image acquisition**

352 The acquisition of animal facial images is much more difficult than capturing human facial images,  
353 as neither the environment nor the animal's behavior can be controlled. The user community of such  
354 approaches needs to develop standardized methods. The basic specifications and related requirements  
355 for the acquisition of primate facial images are explained in [S3](#) above. Our early image-capturing work  
356 was done with the golden snub-nosed monkey of the Qinling Mountain in China and we collected  
357 facial images of 196 individuals. We also travelled to the Tangjiahe Nature Reserve and collected more  
358 than 2,000 facial images of 30 wild Tibetan macaques. Further, we captured images from 18 zoos in 16  
359 cities including Chengdu, Taiyuan, Shijiazhuang, Beijing, Qinhuangdao, Dalian, Weihai, Qingdao,  
360 Jinan, Shanghai, Ningbo, Hangzhou, Suzhou, Wuxi, Nanjing, and Xi'an. In total, we obtained 102,399  
361 facial images of 1040 individuals, from 41 species.

### 362 **(2) Image data processing**

363 After obtaining the images, the facial areas of each primate individual must be extracted from the  
364 images using manually screenshot methods or face detection methods, such as Faster RCNN. Primates  
365 are gregarious animals, which typically result in individual images showing multiple individuals. In  
366 this case, the most challenging task for us is individual recognition as many animals look so similar.  
367 Therefore, we had to carefully identify which animal the facial image was from. We did this by  
368 checking the position of each in all the images or repeatedly comparing the differences between them  
369 through visual interpretation. Therefore, most of the facial images were identified manually using  
370 screenshots to avoid data confusion. This manual method of face detection can only be applied to those  
371 images which have one or very few individuals. We found it best to have all the facial images in our  
372 dataset to be square, contain almost all the facial information of the individuals, and have as little  
373 background as possible.

### 374 **(3) Construction of Primate Facial Image Datasets**

375 When image acquisition and processing are completed, researchers need to build a dataset of  
376 facial images. For our dataset, we classified all the facial images by species and the facial images of

377 each individual were assigned a unique label. In our data set, there were differences in the number of  
378 individuals among species (e.g., golden snub-nosed monkey had 43,304 facial images of 227  
379 individuals and each individual had an average of 191 facial images, *Cebus apella* had 3,026 facial  
380 images of 43 individuals, and the average number of facial images for each *C. apella* individual was  
381 70). The average number of facial images for each individual in our dataset was 99. Finally, our image  
382 dataset had a total of 1,040 individuals and 102,399 facial images. A detailed list of all primate species,  
383 the individual numbers in each species and the total number of facial images of each species in our  
384 dataset are given in Table S1.

385 Our images of golden snub-nosed monkeys were captured in the wild. Thus there was greater  
386 variance in the images, compared to the other species where images were obtained from zoos, typically  
387 on single days. The dataset has been made publicly available at the database:

388 (AFD(Animal Face Database): <http://dx.doi.org/10.17632/z3x59pv4bz.2>).

### 389 **S5. Identification of golden snub-nosed monkeys using taken at night**

390 In total, 581 facial images taken of 24 golden snub-nosed monkeys at night were used for face  
391 recognition. Here, 60% were used as training samples, 10% for validation, and 30% as test samples.  
392 The identification accuracy of these night images was 92.03% and the night vision images for 10  
393 golden snub-nosed monkeys are shown in [Figure S17](#).

### 394 **S6. A list of technical terms**

395 **CNN:** A convolutional neural network (CNN or ConvNet) is a class of deep, feed-forward artificial  
396 neural networks that have successfully been applied to analyzing visual imagery. An early development  
397 of CNN for facial recognition was developed by Lawrence and colleagues (Krizhevsky et al, 2012), but  
398 it has been subsequently improved (Lecun et al, 2015).

399 **RCNN:** Regions with CNN features. RCNN is an object detection model based on the CNN network. It  
400 uses the selective search method to get 2,000 candidate boxes with different sizes, and then CNN  
401 network is used to extract the regional features for the classification of the objects and background.

402 **Fast RCNN** is a fast object detection model based on multi-task learning. In the training phase, Fast  
403 RCNN is 9 times faster than RCNN. During the testing phase, Fast RCNN is 213 times faster than  
404 RCNN (Girshick, 2015).

405 **RPN:** Region Proposal Network. RPN can obtain a series of object proposals from arbitrary images. It  
406 provides the suspected areas for object detection models.

407 **Faster RCNN:** This is a newer version of an object detection model of fast RCNN. The network  
408 structure mainly includes RPN and fast RCNN. RPN is used to select the suspected areas where the  
409 objects may exist in the image. The fast RCNN is used to identify whether these suspected areas  
410 actually are the objects.

411 **ResNet:** Residual Network. The residual network uses the convolutional layers to perform residual  
412 learning to solve the problem of performance degradation when the network goes deeper. The existing  
413 ResNet models have ResNet-20, ResNet-34, ResNet-51, ResNet-101, ResNet-152, and other improved  
414 related network models.

415 **Shallow ResNet:** Shallow ResNet is an improved deep residual network proposed in this paper.  
416 Shallow ResNet simplifies the network structure based on the traditional ResNet. The convolution  
417 layers are increased to form new types of residual blocks, which can improve feature learning ability.  
418 Shallow ResNet is a good solution to the problem that the traditional network models with fewer layers  
419 are hard to extract the deep features of the animal facial images, but the features extracted by deep  
420 network models lose more information.

421

#### 422 **Supplemental References**

423 Girshick, R. (2015). Fast r-cnn. IEEE international conference on computer vision (ICCV) (IEEE  
424 E, New York). 1440-1448.

425 Ren, S., He, K. M., Girshick, R., and Sun, J. (2015). Faster r-cnn: Towards real-time object d  
426 etection with region proposal networks. Advances in Neural Information Processing Systems (N  
427 IPS). 91-99.

428 Krizhevsky, A., Sutskever, I., and Hinton, G. E. (2012). Imagenet classification with deep conv  
429 olutional neural networks. Conference on Neural Information Processing Systems (NIPS) (Curra  
430 n Associates Inc). 1097-1105.

431 Lecun, Y., Bengio, Y., and Hinton, G. E. (2015). Deep learning. Nature, 521, 436-444.

432 Ohayon, S., Avni, O., Taylor, A. L., Perona, P., and Egnor, S. R. (2013). Automated multi-day  
433 tracking of marked mice for the analysis of social behaviour. J Neurosci Methods, 219, 10-1  
434 9.
